# Supplementary material
Source: PubMed Central journal article supplement (PMC9758717)
Supplement: JZhejiangUnivSciB-23-12-1014-s001.pdf [file JZhejiangUnivSciB-23-12-1014-s001.pdf]

**Table S1 Primers used in RT-PCR and qPCR (rat)**

| Gene           | Forward (5'→3')         | Reverse (5'→3')          | Product size (bp) |
|----------------|-------------------------|--------------------------|-------------------|
| Adiponectin    | GTTCCCATTCGCTTTACT      | AAGAGGCTCACTTTCACA       | 146               |
| AdipoR1        | CCACACAGAAACTGGCAACA    | CAGGAAGAACATCCCGAAGA     | 142               |
| AdipoR2        | ACTATGAAAATAGCCCCGAG    | TCCCACACCTTACAAACAA      | 140               |
| T-cadherin     | GCGGGCTGGCTGAGTATTA     | CTGAGGTTTCTGGCGTCGT      | 239               |
| Calreticulin   | TGAATACTCCCCGATGCGA     | ACACCCAGGTCTCATTGCC      | 156               |
| β-actin        | CACGATGGAGGGGCCGACTCATC | TAAAGACCTCTATGCCAACACAGT | 241               |
| TNF-α          | TCTATTCTGCTCGTGG        | TCCTCCGCTTGGTGGTTT       | 202               |
| TNF-α receptor | AGAGGTGGAGGGTGAAGGAAT   | AGACAGGATGACTGAAGCGT     | 128               |
| Rat α-SMA      | ACCCACAATGTCCCCATCTA    | TCTCCAGGAAGAAGACGAA      | 235               |
| Rat UII        | ATCCACTCCTGTCTTTTCCC    | GTTGTTTCTGGTTCTCGCC      | 276               |

RT-PCR: reverse transcription-polymerase chain reaction; qPCR: quantitative real-time PCR; AdipoR: adiponectin receptor; TNF-α: tumor necrosis factor-α; α-SMA: α-smooth muscle actin; UII: urotensin II.

**Table S2 Primers used in RT-PCR and qPCR (mouse)**

| Gene         | Forward (5'→3')         | Reverse (5'→3')          | Product size (bp) |
|--------------|-------------------------|--------------------------|-------------------|
| β-actin      | CACGATGGAGGGGCCGACTCATC | TAAAGACCTCTATGCCAACACAGT | 241               |
| AdipoR1      | TATAAGGTCTGGGAGGGACG    | CCGAAAGGAGGGCATAGGTG     | 114               |
| AdipoR2      | GAGTGTTCTGGGCTTAGGC     | GGCAGCTCCGGTGATATAGA     | 140               |
| T-cadherin   | AGTCCCCATTCGTCCACAAC    | GGCATCATCGCAGACCTCAG     | 164               |
| Calreticulin | AAGGGCAAGAATGTGCTGAT    | TGGCAGAAAGTCCCAATCAT     | 162               |
| Mouse UII    | GAATCCACTGCTGTCCCTTC    | GTTGTTTCTGGTTCTTGCC      | 278               |

RT-PCR: reverse transcription-polymerase chain reaction; qPCR: quantitative real-time PCR; AdipoR: adiponectin receptor; UII: urotensin II.

**Table S3 Interference sequences used in siRNA**

| Gene             | Serial number | Forward (5'→3')       | Reverse (5'→3')       |
|------------------|---------------|-----------------------|-----------------------|
| Negative control | NA            | UUCUCCGAACGUGUCACGUTT | ACGUGACACGUUCGGAGAATT |
| AdipoR1          | 582           | GGGCUUGCUUCAAGAGCAUTT | AUGCUCUUGAAGCAAGCCCTT |
| AdipoR1          | 1059          | CCACCAUGCACUUUACUAUTT | AUAGUAAAGUGCAUGGUGGT  |
| AdipoR1          | 1161          | GCCUUUAUGCUGCUCGGAUTT | AUCCGAGCAGCAUAAAGGCT  |
| T-cadherin       | 1197          | CCGUGGGAGUCAUUGUCAATT | UUGACAAUGACUCCACGGTT  |
| T-cadherin       | 249           | GCAACAAGAAGCUGCACUATT | UAGUGCAGCUUCUUGUUGCTT |
| T-cadherin       | 763           | GGAAGUCAUCGUGAUUGAUTT | AUCAAUACGAUGACUUCCTT  |
| Calreticulin     | 169           | CUGGGUCGAAUCCAAACAUTT | AUGUUUGGAUUCGACCCAGTT |
| Calreticulin     | 516           | GCAAGAACGUGCUGAUCAATT | UUGAUCAGCACGUUCUUGCTT |
| Calreticulin     | 866           | CCUGAAUACAAGGGCGAUTT  | AUUCGCCCUUGUAUUCAGGTT |

siRNA: small interference RNA; NA: not available; AdipoR: adiponectin receptor.
